# Supplementary material for: Comparison of Four ChIP-Seq Analytical Algorithms Using Rice Endosperm H3K27 Trimethylation Profiling Data
Source: PubMed Central journal article supplement (PMC3184143; doi:10.1371/journal.pone.0025260), 2011-09-30
Supplement: pone.0025260.s005.pdf [file pone.0025260.s005.pdf]

**Table S5. MACS program parameters**

| MACS   |        |                                                            |
|--------|--------|------------------------------------------------------------|
| Name   | Value  | Description                                                |
| mfold  | 5 (5)  | threshold for high quality peaks when determining <i>d</i> |
| gsize  | 3.66E8 | effective genome size                                      |
| tsize  | 36     | tag length                                                 |
| bw     | 120    | bandwidth (length of sheared fragments)                    |
| pvalue | 0.05   | p-value to determine significant peaks                     |

This table shows the parameters that were used when running MACS. Default parameters were used for all other values.
