# Supplementary material for: Comparison of Four ChIP-Seq Analytical Algorithms Using Rice Endosperm H3K27 Trimethylation Profiling Data
Source: PLOS journal article supplement (doi:10.1371/journal.pone.0025260), 2011-09-30
Supplement: S2 (10.1371/journal.pone.0025260.s002) [file journal.pone.0025260.s002]

**Table S2. FindPeaks program parameters**

| FindPeaks |        |                                                             |
|-----------|--------|-------------------------------------------------------------|
| Name      | Value  | Description                                                 |
| dist_type | 1 200  | method to extend tags                                       |
| minimum   | 8      | minimum number of tags for enrichment                       |
| hist_size | 100    | number of cells in the output FDR histogram                 |
| eff_size  | 3.66E8 | mappable size of genome                                     |
| trim      | .2     | portion of either side of peak to remove when calling peaks |
| subpeaks  | .5     | minimum relative valley depth to separate two peaks         |
| mcfdr     | 20     | iterations to use for Monte Carlo simulation                |

This table shows the parameters that were used when running FindPeaks. Default parameters were used for all other values.
