# Supplementary material for: Comparison of Four ChIP-Seq Analytical Algorithms Using Rice Endosperm H3K27 Trimethylation Profiling Data
Source: PLOS journal article supplement (doi:10.1371/journal.pone.0025260), 2011-09-30
Supplement: S3 (10.1371/journal.pone.0025260.s003) [file journal.pone.0025260.s003]

**Table S3. USeq program parameters**

| USeq                |      |         |                                                                                             |
|---------------------|------|---------|---------------------------------------------------------------------------------------------|
| Script              | Name | Value   | Description                                                                                 |
| PeakShiftFinder     | -w   | 12      | window size                                                                                 |
|                     | -d   | 8       | minimum normalized window score                                                             |
| ScanSeqs            | -p   | 75      | peak shift, average distance between + and – strand peaks                                   |
|                     | -w   | 589     | window size                                                                                 |
|                     | -f   | na      | filter windows with high control read count                                                 |
|                     | -g   | 4       | standard deviations off median of control read count (wrong)                                |
|                     | -i   | 1,2,4   | score indices, QValFDR, EmpFDR, and Log2Ratio                                               |
| EnrichedRegionMaker | -s   | 20,13,1 | thresholds for scores, $-10\log_{10}(\text{FDR}/\text{p-val})$ where 13 = 5%, 20 = 1%, etc. |

This table shows the parameters that were used when running USeq. Default parameters were used for all other values.
